# Supplementary material
Source: publisher figshare collection journal article supplement (https://acs.figshare.com/ndownloader/files/16236512)
Supplement: Supplementary file 1 [file 16236512]

# Supporting Information: Electron Transfer Activity in a Cyanide-Bridged Fe<sub>42</sub> Nanomagnet

Michael L. Baker,<sup>\*,†,‡</sup> Shu-Qi Wu,<sup>¶</sup> Soonchul Kang,<sup>§</sup> Satoshi Matsuzawa,<sup>||</sup>  
Marie-Anne Arrio,<sup>⊥</sup> Yasuo Narumi,<sup>#</sup> Takumi Kihara,<sup>||</sup> Tetsuya Nakamura,<sup>@</sup>  
Yoshinori Kotani,<sup>@</sup> Osamu Sato,<sup>\*,¶</sup> and Hiroyuki Nojiri<sup>\*,||</sup>

<sup>†</sup>*The School of Chemistry, The University of Manchester at Harwell, Didcot, OX11 0FA, UK.*

<sup>‡</sup>*The School of Chemistry, The University of Manchester, M139PL, Manchester, UK.*

<sup>¶</sup>*Institute for Materials Chemistry and Engineering, Kyushu University, 744 Motoooka, Nishi-ku, Fukuoka, 819-0395, Japan.*

<sup>§</sup>*Department of Chemical Engineering, Graduate School of Engineering, Hiroshima University, 1-4-1, Kagamiyama, Higashihiroshima, Hiroshima, 739-8527, Japan.*

<sup>||</sup>*Institute for Materials Research, Tohoku University, Katahira, Sendai 980-8577, Japan.*

<sup>⊥</sup>*Institut de Minéralogie, de Physique des Matériaux et de Cosmochimie, CNRS, Sorbonne Université, IRD, MNHN, UMR7590, 75252 Paris Cedex 05, France.*

<sup>#</sup>*Center of Advanced High Magnetic Field Science, Osaka University, Toyonaka 1-1, Osaka 560-0043, Japan.*

<sup>@</sup>*Japan Synchrotron Radiation Research Institute (JASRI), Sayo, Hyogo 679-5198, Japan.*

E-mail: michael.baker@manchester.ac.uk; sato@cm.kyushu-u.ac.jp; nojiri@imr.tohoku.ac.jp

# Specific Heat Capacity

Since molecular clusters with large spin moments can exhibit dipolar field driven three dimensional ordering,<sup>1-4</sup> we measured the low temperature specific heat capacity of Fe<sub>42</sub> and confirmed that the S=45 ground state is molecular in origin. Specific heat capacity measurements down to 0.5 K (Figure S1) do not show the appearance of a  $\lambda$ -type anomaly associated with a magnetic phase transition. A broad shoulder deviating from the lattice contribution to the specific heat is observed in zero field at 5 K, consistent with a Schottky anomaly, associated with weak exchange coupling within the molecule. The application of an applied field of 1 T sees this broad feature shift up to 8 K in accordance with the Zeeman-effect. A lack of evidence of anisotropy induced zero-field splitting, confirms the isotropic nature of the S=45 ground state, a result of the cluster's symmetry.

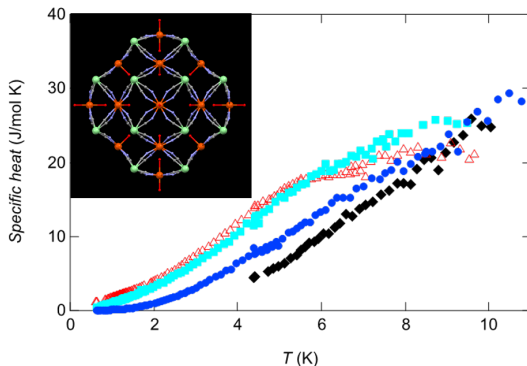

Figure S1: Specific heat capacity of polycrystalline Fe<sub>42</sub> measured at 0 T (red triangles), 1 T (blue squares), 5 T (blue circles) and 10 T (black diamonds). Insert: Fe<sub>42</sub> skeleton crystal structure. The 24 {Fe(Tp)(CN)<sub>3</sub>} are shown as green spheres, the {Fe(NC)<sub>4</sub>(H<sub>2</sub>O)<sub>2</sub>} and {Fe(NC)<sub>4</sub>(dpp)(H<sub>2</sub>O)} are shown as orange spheres with axial O atoms shown as small red spheres, C; grey spheres and N; blue spheres) and terminal ligand atoms removed clarity.

# Charge Transfer Multiplet Calculations

Charge transfer multiplet simulations of XAS and XMCD are used to determine Fe ion ground states, crystal fields, and nature of metal - ligand hybridization. The calculations were implemented using the TT-multiplets suite of programs. To simulate the spectra, the

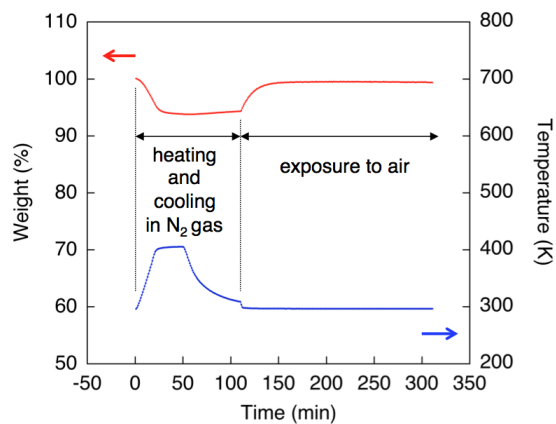

Figure S2: Thermal gravimetric analysis of  $\text{Fe}_{42}$ . A 5% weight loss is observed on heating the sample above room temperature. The lost mass is recovered on exposure of the sample to to air at room temperature.

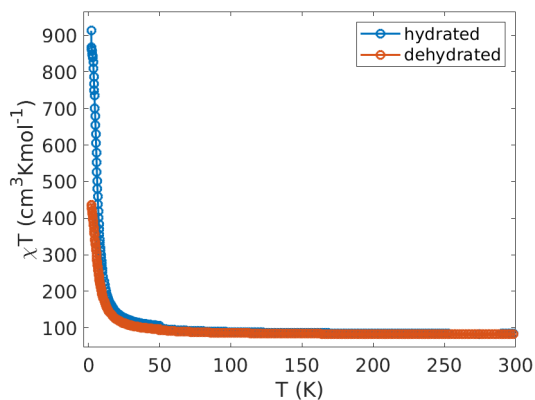

Figure S3: Magnetic susceptibility plotted as the  $\chi T$  product as a function of temperature for a powder sample of  $\text{Fe}_{42}$  in hydrated and dehydrated forms. A applied field of 50 Oe is applied from 2 to 50 K and 1000 Oe from 51 K to 300 K.

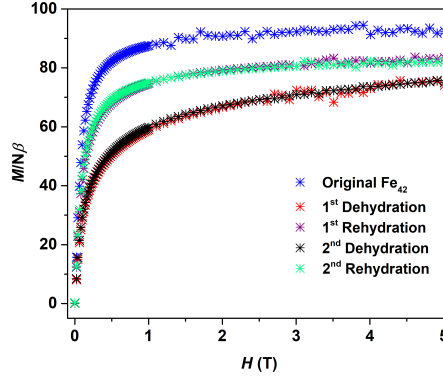

Figure S4: Magnetisation as a function of external magnetic field for a powder sample of  $\text{Fe}_{42}$  during two dehydration-rehydration cycles at 2 K.

Slater-Condon-Shortley parameters, the radial ( $F^i$  and  $G^i$ ) and angular part ( $f^i$  and  $g^i$ ) of Coulomb repulsion and Coulomb exchange interaction, were reduced and fixed to 80% of their Hartree-Fock calculated values in order to account for the overestimation of electron-electron repulsion found in the calculations of the free ion. Ligand-metal hybridisation was modelled using the valence bond configuration interaction approach with charge transfer pathways differentiated according to  $3d$  orbital symmetry, as outlined in the main text.

## Simulations of Reference Spectra

The XAS simulation of  $\text{K}_2[\text{Fe}^{\text{II}}(\text{Tp})(\text{CN})_3]$  and  $\text{Li}[\text{Fe}^{\text{III}}(\text{Tp})(\text{CN})_3]$  reference spectra were performed in  $O_h$  crystal field symmetry, where the  $10Dq$  free parameter defines the energy separation between  $e_g$  and  $t_{2g}$  orbitals. Ligand-metal hybridization was simulated using metal to ligand charge transfer (MLCT) via the  $t_{2g}$  orbital symmetry ( $T_{M,t_{2g}}$ ) and ligand to metal charge transfer via the  $e_g$  orbital symmetry ( $T_{L,e_g}$ ). In the case of  $\text{Li}[\text{Fe}^{\text{III}}(\text{Tp})(\text{CN})_3]$  XAS calculations include LMCT hybridization term is also included via  $t_{2g}$  orbital ( $T_{L,t_{2g}}$ ) to account for delocalisation of ligand p orbital character into the  $t_{2g}$  hole. The energy separating the charge transfer configurations are  $\Delta$  and  $\Delta^*$  for LMCT and MLCT respectively. The parameters obtained fitting the  $\text{K}_2[\text{Fe}^{\text{II}}(\text{Tp})(\text{CN})_3]$  and  $\text{Li}[\text{Fe}^{\text{III}}(\text{Tp})(\text{CN})_3]$  reference spectra (table S1) were fixed for the simulation of  $\text{Fe}_{42}$  XAS spectra. XMCD simulations of

$\text{Li}[\text{Fe}^{\text{III}}(\text{Tp})(\text{CN})_3]$  were performed using the model and parameters previously adopted in Ref. 5.

## Simulations of $\text{Fe}_{42}$

The 24  $\text{Fe}(\text{Tp})(\text{CN})_3$  sites in  $\text{Fe}_{42}$  are chemically identical to the reference compounds  $\text{K}_2[\text{Fe}^{\text{II}}(\text{Tp})(\text{CN})_3]$  and  $\text{Li}[\text{Fe}^{\text{III}}(\text{Tp})(\text{CN})_3]$ . The remaining 18 sites do not exist as mononuclear compounds, 6  $\{\text{Fe}(\text{NC})_4(\text{H}_2\text{O})_2\}$  and 12  $\{\text{Fe}(\text{NC})_4(\text{dpp})(\text{H}_2\text{O})\}$  (together, abbreviated as  $\{\text{FeNC}_4\}$ ). The two moieties are very similar making differentiation of the two species in  $\text{Fe}_{42}$  unjustifiable. The XMCD of  $\text{Fe}_{42}$  indicates the presence of both Fe(II) and Fe(III) high-spin species amongst the 18  $\{\text{FeNC}_4\}$  ensemble. Initial simulations were performed with all 18  $\{\text{FeNC}_4\}$  as Fe(III), a parameter space including a broad range of both crystal field, hybridization terms and the charge transfer energy parameters do not fit the double  $\text{L}_3$  XMCD feature or the XAS suitably. A second attempt fixed  $\{\text{FeNC}_4\}$  valences to 6  $\{\text{Fe}^{\text{II}}\text{NC}_4\}$  and 12  $\{\text{Fe}^{\text{III}}\text{NC}_4\}$ , in this case the double negative peaks in the  $\text{L}_3$  XMCD could be reproduced, but with incorrect intensity ratios. Only with equal a number of Fe(II) and Fe(III) valence  $\{\text{FeNC}_4\}$  is the XMCD and XAS reproduced.

The nitrogen end cyanide ligation does not exhibit sizeable MLCT, hence the inclusion of LMCT type hybridization is sufficient.<sup>6</sup> The  $\{\text{Fe}^{\text{III}}\text{NC}_4\}$  sites include hybridization via two corresponding  $T_{L,t_{2g}}$  and  $T_{L,e_g}$  terms. To obtain the best fit of XMCD and XAS an additional crystal field parameter  $Ds$  is added to the simulation of  $\{\text{Fe}^{\text{II}}\text{NC}_4\}$  which distort the energy of the 3d orbitals to  $C_{4v}$ . This distortion is consistent with a reduced coordination number due to the loss of axial water molecules. The energy of the orbitals with respect to the  $10Dq$  and  $Ds$  parameters are as follows:

$$\begin{aligned}
b_1(d_{x2y2}) &= 6Dq + 2Ds \\
a_1(d_{z2}) &= 6Dq - 2Ds \\
b_2(d_{xy}) &= -4Dq + 2Ds \\
e(d_{xz,yz}) &= -4Dq - Ds.
\end{aligned}$$

Table S1: Parameters for XAS charge transfer multiplet simulations of {FeTp} reference samples.

| compound                 | 10Dq (eV) | $T_{L,t2g}$ | $T_{L,e_g}$ | $T_{M,t2g}$ | $\Delta$ (eV) | $\Delta^*$ (eV) |
|--------------------------|-----------|-------------|-------------|-------------|---------------|-----------------|
| $K_2[Fe^{II}(Tp)(CN)_3]$ | 1.9706    | -           | 1.0505      | 1.7845      | -3.3839       | -2.4997         |
| $Li[Fe^{III}(Tp)(CN)_3]$ | 2.9597    | 0.8808      | 1.7859      | 1.7284      | -3.4340       | 0.8710          |

Table S2: Parameters for XAS and XMCD charge transfer multiplet simulations of high spin Fe sites in  $Fe_{42}$ .

| Moiety             | 10Dq (eV) | Ds (eV) | $T_{L,b_1} (d_{x2y2})$ | $T_{L,a_1} (d_{z2})$ | $T_{L,b_2} (d_{xy})$ | $T_{L,e} (d_{xz,yz})$ | $\Delta$ (eV) |
|--------------------|-----------|---------|------------------------|----------------------|----------------------|-----------------------|---------------|
| $\{Fe^{II}NC_3\}$  | 0.8       | 0.05    | 0.2678                 | 0.0000               | 0.08520              | 0.0000                | 0             |
| $\{Fe^{III}NC_3\}$ | 1.2       | 0.00    | 0.7810                 | 0.7809               | 0.55515              | 0.5551                | -1            |

## XAS Data Reduction

Figure S5 shows both left and right circularly polarized XAS and XMCD of  $Fe_{42}$ . Before fitting the measured XAS spectra a linear background function was subtracted from each averaged data set and two arctangent functions of the form  $absorption\ I(energy) = \tan^{-1}[k(energy - L_3) + \pi/2](2/3)(1/\pi) + \tan^{-1}[k(energy - L_2) + \pi/2](1/3)(1/\pi)$ , where  $k = 0.295$  and  $L_2 = L_3 + 12.3eV$  (energy split by  $2p^5$  spin-orbit coupling), were used to model the  $L_3$  and  $L_2$  edge jumps.

Radiation damage due to x-ray overexposure is limited by use of a shutter system reducing exposure for each incident x-ray energy to 200 ms. With sequential reduction of the incident

x-ray flux, short scans over the the  $L_3$ -edge were repeated over the same sample spot to confirm that the spectra were not affected by damaged species contributions. Additionally, reduction of the sample temperature to  $< 200$  K was found to reduce sample damage effects.

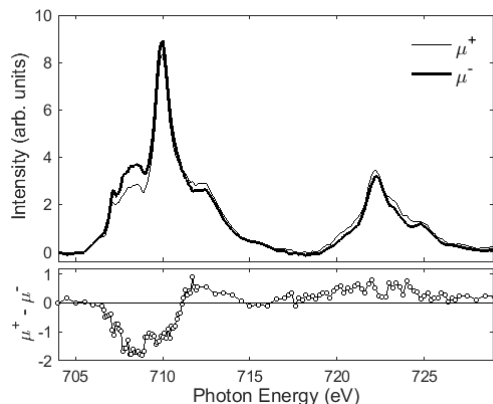

Figure S5: The circularly polarized  $L_{2,3}$ -edge XAS (BL25SU, SPring-8) of  $Fe_{42}$  (Top panel) and XMCD ( $\mu^+ - \mu^-$ ) (bottom panel). The measurements were performed at 15 K with an applied field of 1.9 T.

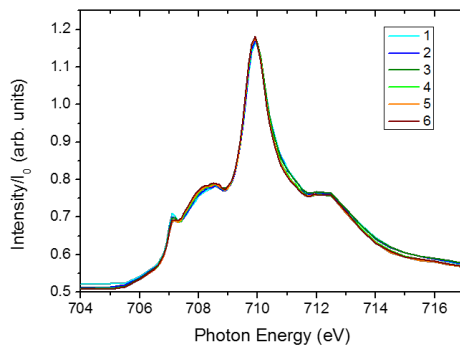

Figure S6:  $L_3$ -edge XAS (BL25SU, SPring-8) of  $Fe_{42}$  ( $\mu^+ + \mu^-$ ) 1 to 6 are repeat measurements on the same sample spot indicating control of x-ray damage.

## References

- (1) Larionova, J.; Gross, M.; Pilkington, M.; Andres, H.; Stoeckli-Evans, H.; Güdel, H. U.; Decurtins, S. High-Spin Molecules: A Novel Cyano-Bridged Mn Molecular Cluster with

- a  $S=51/2$  Ground State and Ferromagnetic Intercluster Ordering at Low Temperatures. *Angew. Chem. Int. Ed.* **2000**, *39*, 1605–1609.
- (2) Evangelisti, M.; Candini, A.; Ghirri, A.; Affronte, M.; Powell, G. W.; Gass, I. A.; Wood, P. A.; Parsons, S.; Brechin, E. K.; Collison, D.; Heath, S. L. Tunable Dipolar Magnetism in High-Spin Molecular Clusters. *Phys. Rev. Lett.* **2006**, *97*, 167202.
  - (3) Pratt, F. L.; Micotti, E.; Carretta, P.; Lascialfari, A.; Arosio, P.; Lancaster, T.; Blundell, S. J.; Powell, A. K. Dipolar ordering in a molecular nanomagnet detected using muon spin relaxation. *Phys. Rev. B* **2014**, *89*, 144420.
  - (4) Schnack, J. Influence of intermolecular interactions on magnetic observables. *Phys. Rev. B* **2016**, *93*, 054421.
  - (5) Jafri, S. F.; Koumoussi, E. S.; Saintavit, P.; Juhin, A.; Schuler, V.; Bunău, O.; Mitcov, D.; Dechambenoit, P.; Mathonière, C.; Clérac, R.; Otero, E.; Ohresser, P.; Cartier dit Moulin, C.; Arrio, M.-A. Large Orbital Magnetic Moment Measured in the [TpFeIII(CN)3] Precursor of Photomagnetic Molecular Prussian Blue Analogues. *Inorg. Chem.* **2016**, *55*, 6980–6987.
  - (6) Arrio, M.-A.; Saintavit, P.; Cartier dit Moulin, C.; Mallah, T.; Verdaguer, M.; Pellegrin, E.; Chen, C. T. Characterization of Chemical Bonds in Bimetallic Cyanides Using X-ray Absorption Spectroscopy at L2,3 Edges. *J. Am. Chem. Soc.* **1996**, *118*, 6422–6427.
